# Supplementary material for: Complexes of 2,6-dimethylpyridine with water in condensed phases and the dynamical co-operative interactions involving hydrogen bonds
Source: Royal Society of Chemistry journal article supplement (doi:10.1039/b818747a), 2009-01-01
Supplement: b818747a.pdf [file b818747a.pdf]

Supplementary information to “**Complexes of 2,6-dimethylpyridine with water in condensed phases and the dynamical co-operative interactions involving hydrogen bonds**” by W. Marczak, K. Kiełek, B. Czech, H. Flakus and M. Rogalski

The liquidus ( $T_L$ ) and eutectic ( $T_E$ ) temperatures, and enthalpies of fusion ( $\Delta_f H$ ) for the system 2,6-dimethylpyridine (1) + water (2) determined calorimetrically

| $x_1$  | $T_L / \text{K}$ | $T_E / \text{K}$ | $\Delta_f H / (\text{kJ mol}^{-1})$ |
|--------|------------------|------------------|-------------------------------------|
| 0      | 273.2            |                  | 5.99                                |
| 0.0101 | 273.7            | 262.2            | 5.57                                |
| 0.0255 | 273.5            | 262.5            | 5.47                                |
| 0.0501 | 272.8            | 262.5            | 5.18                                |
| 0.1001 | 271.3            | 262.3            | 4.81                                |
| 0.2015 | 263.4            |                  | 5.04                                |
| 0.2495 | 264.0            |                  | 4.95                                |
| 0.2983 | 266.6            | 261.9            | 5.22                                |
| 0.3908 | 270.9            | 262.2            | 6.47                                |
| 0.3908 | 270.9            | 262.1            | 6.38                                |
| 0.4513 | 272.4            | 261.8            | 7.05                                |
| 0.5013 | 273.0            |                  | 7.87                                |
| 0.5470 | 272.4            | 257.0            | 7.65                                |
| 0.5900 | 270.8            | 257.2            | 8.02                                |
| 0.5900 | 271.0            | 257.5            | 7.79                                |
| 0.6347 | 269.3            | 257.8            | 8.02                                |
| 0.6990 | 265.2            | 258.1            | 8.72                                |
| 0.7991 |                  | 257.5            | 9.48                                |
| 0.9008 | 260.9            | 256.9            | 10.33                               |
| 1      | 266.6            |                  | 12.74                               |

Coefficients of the polynomials (eq. 2) for density of the system 2,6-dimethylpyridine (1) + water (2) in the temperature limits (273.15 – 293.15 K) and standard deviations of the fit  $\delta$

| $x_1$   | $a_0$            | $a_1$            | $a_2 \times 10^3$ | $a_3 \times 10^5$ | $\delta$ |
|---------|------------------|------------------|-------------------|-------------------|----------|
| 0.04987 | 1005.739 ± 0.001 | -0.3460 ± 0.0003 | -4.28 ± 0.04      | 1.3 ± 0.1         | 0.001    |
| 0.10930 | 1008.899 ± 0.001 | -0.6438 ± 0.0002 | -2.12 ± 0.01      |                   | 0.001    |
| 0.16637 | 1008.760 ± 0.002 | -0.7864 ± 0.0004 | -1.47 ± 0.02      |                   | 0.002    |
| 0.23060 | 1006.029 ± 0.002 | -0.8622 ± 0.0003 | -1.18 ± 0.02      |                   | 0.002    |
| 0.28419 | 1002.418 ± 0.002 | -0.8901 ± 0.0004 | -1.12 ± 0.02      |                   | 0.002    |
| 0.33272 | 999.849 ± 0.002  | -0.9072 ± 0.0005 | -0.89 ± 0.03      |                   | 0.002    |
| 0.37006 | 995.325 ± 0.001  | -0.9110 ± 0.0002 | -1.07 ± 0.01      |                   | 0.001    |
| 0.41178 | 991.609 ± 0.001  | -0.9172 ± 0.0002 | -0.99 ± 0.01      |                   | 0.001    |
| 0.44399 | 988.688 ± 0.001  | -0.9198 ± 0.0002 | -0.95 ± 0.01      |                   | 0.001    |
| 0.47125 | 986.144 ± 0.001  | -0.9215 ± 0.0003 | -0.91 ± 0.01      |                   | 0.001    |
| 0.49859 | 983.577 ± 0.001  | -0.9221 ± 0.0003 | -0.88 ± 0.01      |                   | 0.001    |
| 0.52137 | 981.507 ± 0.002  | -0.9221 ± 0.0005 | -0.85 ± 0.03      |                   | 0.003    |
| 0.56475 | 977.362 ± 0.000  | -0.9197 ± 0.0003 | -0.71 ± 0.04      |                   | 0.001    |
| 0.66571 | 967.603 ± 0.000  | -0.9054 ± 0.0001 | -0.77 ± 0.00      |                   | 0.000    |
| 0.78828 | 956.307 ± 0.001  | -0.8906 ± 0.0001 | -0.64 ± 0.01      |                   | 0.001    |
| 0.90276 | 947.095 ± 0.002  | -0.8854 ± 0.0004 | -0.49 ± 0.02      |                   | 0.002    |
| 1       | 940.330 ± 0.001  | -0.8851 ± 0.0002 | -0.30 ± 0.01      |                   | 0.001    |
